# Supplementary material for: Optimizing Viable Leukocyte Sampling from the Female Genital Tract for Clinical Trials: An International Multi-Site Study
Source: PubMed Central journal article supplement (PMC3893217; doi:10.1371/journal.pone.0085675), 2014-01-15
Supplement: pone.0085675.s004.pdf [file pone.0085675.s004.pdf]

## **Mononuclear Leukocyte Isolation from Cervicovaginal Lavage**

### **Procedure**

1. Single Cell Preparation from Cervicovaginal Lavage
  - 1.1 Centrifuge the sample for 10 minutes at 250g (~1200 rpm on most centrifuges) with low brake.
  - 1.2 Carefully decant supernatant and resuspend as needed for further use.
